# Supplementary material for: Expression profiles of the immune genes CD4, CD8β, IFNγ, IL-4, IL-6 and IL-10 in mitogen-stimulated koala lymphocytes (Phascolarctos cinereus) by qRT-PCR
Source: PubMed Central journal article supplement (PMC3961157; doi:10.7717/peerj.280), 2014-03-04
Supplement: peerj-02-280-s001.pdf [file peerj-02-280-s001.pdf]

**Supplementary Material A: Multiple** sequence alignment of marsupial CD4, CD8 $\beta$ , IFN $\gamma$ , IL-4, IL-6, IL-10, and GAPDH. Boxed sequences are qPCR primers. GenBank accession numbers are listed in Table 1.

**CD4**

```

Phci CD4  GTGTTCAAGGTGACA[CCCAACCCAAGTGA]CTCTGTGTTCTCTGGAACCAACGTGATTTTAACTTGCACGGCTCTTCCAA : 80
Saha CD4  -----G-----A---T.A.A.A..T-----AG...A...C.....A..A..TA..C.C....G : 452
Maeu CD4  -----C-----A---A..A..T-----C.....T.....G.....A.....C..... : 712
Modo CD4  -----T-----G-----C-----G.A.....C.....T.....A..C..C.... : 714

Phci CD4  CCTTCCTGCACTCAAGGTGG[ATGGAGTGGTCCAGGAGA]CAAAAGTAAAAGGATCCTGAGTCAAGACAAGAAAACCTCTGA : 160
Saha CD4  -----G.T-----A-----T-----T-----T-----T----- : 532
Maeu CD4  -----T.T-----G-----T-----C.A.....A.....T..... : 792
Modo CD4  -----A..T..AA.A.....CA.....A.T.C.....TC.A.....CT... : 794

Phci CD4  AGTTGGTGCAAAATAGAGACCAGCGAAGGGGGTGTGTGGGAYTGTACCGTCTCTGTGAATGACAAAGCCCTGAAATTGAGC : 240
Saha CD4  .C..AA.C..T..G..C..AA.....A..A.T..T....GATA.....G...A..... : 612
Maeu CD4  .C.....A..G.G.C.A.A..AC..C.C.....TT.....G...A..A.....G... : 872
Modo CD4  .C...C.C..G.G..TT.TGAG..G.A...A.AA..AG...C..T....CA.A...G...AG...T...C... : 874

Phci CD4  ATCACAGTCACAGTGTGTTGGTTTCACATCGTCTCCTCCAGACCTTCTACATGATGACAGGCCAAACCTGCCAAATTCTCCTT : 320
Saha CD4  ....A.....A.....AC.A.....A.....TGG.....A...T.C..... : 692
Maeu CD4  ....A.....CA.....AAA..T..T.....T.C.....GTG.....G..T..G..... : 952
Modo CD4  .AA.G.....ACA.....G.CACC...A...CG..A...T.A...AG.....GA...G.....AA... : 954

Phci CD4  CCCTCTGAATTTAAACGAACAGGATCTGAACAGGGAACATCCAAA TGGAGA AACTGAGGTGGCAGGTGGAAGGTGCTGCCT : 400
Saha CD4  ....T..G.....G.....A...GA.....A.....T.C.CA.....T..... : 772
Maeu CD4  ....T..C..A..G.....T.....G.....A.CA.....CA...T..... : 1032
Modo CD4  ....A.....GG.....C..ATGGTG.....CT...C.G.....G..... : 1034

Phci CD4  CTCCCCCGGTCGGCCAAGTTTTTCATGGAAGGGTGA CTCTTTGACTCTAGAAAAGGGGGCTCCAAATTTTCAGTCGTGAT : 480
Saha CD4  ....AA.A.C.A.....A.....A.A.TAA.....G.CCA...T...AT.....AAGCG..G : 852
Maeu CD4  ....A---A.GT..T.....A.....C.....G..G..CA.AC...CC...A..... : 1109
Modo CD4  ....AAA---T.....A.....C.....C...G.CAA---TT..G...A..CT..CCA : 1109

Phci CD4  ---CCTAAGTTCCCACTCACCATCACTCTTCACTCTGCTTGCCTCAGCATGCTGGCTCAGGAGTCTT : 525
Saha CD4  AAGT...T...G..A...AT...TCC...C..... : 920
Maeu CD4  ---C...G.....TCCCT...C...TCT..... : 1174
Modo CD4  AAGG.AG.---A...TT.G.G...CTCC..A...C...TC..C..... : 1173

```

**CD8 $\beta$**

```

Phci CD8 $\beta$  1  ACCCACCAAAAAGACCACTCCCAAGAGGAGAGTATGCAATACAAC --- CCCAAAGGTCACTCAACAGAA TGGTTCCCTCT : 77
Phci CD8 $\beta$  2  -----G-----C-----G..C.GA.....AACC.T.G.T.....A.....A..A... : 77
Saha CD8 $\beta$   -----C-----G..A...CCG.....G.AACA.T..G.A.....T..T... : 554
Maeu CD8 $\beta$   -----C.A.A.....A.A.G...CCC.A..AATT...GGT.C.....AG.....C..TT... : 515
Modo CD8 $\beta$ 

Phci CD8 $\beta$  1  GCAGCGCCTTCACCCTAAGCCTGCTGGTGGGA TGTGCTGTGGTTTTGCTGATCTCCA TCA TTGTGATCA TCCGATTGAAT : 157
Phci CD8 $\beta$  2  -----A..... : 157
Saha CD8 $\beta$   .T.A.AT.C..C.T..C.....C.....G.....AC.....A.....TC.A.....C : 597
Maeu CD8 $\beta$   .T..C..C.....C.....C...TC..C.A.....A..... : 634
Modo CD8 $\beta$   .T.T.C.GCT..C.....ATCC..A.....C.A.....C.....A.....C : 595

Phci CD8 $\beta$  1  TATTTATGGA[ATGTAGCTCGGCACCACT]TTGTGAAACAGCTTCAAAGATGAGTACCCCTTCCCACTCAACCC TCCCCCA : 237
Phci CD8 $\beta$  2  -----C.....T..T.....C.....G..C.AT..C..CT----- : 237
Saha CD8 $\beta$   .C.G.....G.C...T.....G.....T.....CT...C.T..T.C----- : 708
Maeu CD8 $\beta$   .C.....C..C.G.....C..T.....AA----- : 653
Modo CD8 $\beta$ 

Phci CD8 $\beta$  1  AAAGA TAAAGTTCTTCAAATAGCCTGCCGAAGAAATGCACTGGATTTTA TATAAGCAGAA TTGGAGGAAC [GAGGCATGA] : 317
Phci CD8 $\beta$  2  -----A.....T.....G.....GC.....A...AGA...CT : 317
Saha CD8 $\beta$   .A.....C.....A...TTA.....G.....C.....A.....A...C... : 787
Maeu CD8 $\beta$   .CA.AG...T.C.....A...T.....A.....C...GC..G.....AA..TGAG...C... : 733
Modo CD8 $\beta$ 

Phci CD8 $\beta$  1  [GAACAGCAA]TGA --ACTTTTGAAATTTTCTAAGCCACTGGGGT : 359
Phci CD8 $\beta$  2  -----T.A.....TG.ACC.....C...G..... : 359
Saha CD8 $\beta$   .T.....T.....C..... : 784
Maeu CD8 $\beta$   .T.....C..... : 829
Modo CD8 $\beta$   .T...G.....ACA...C.....C..... : 775

```

## IFN $\gamma$

Phci IFN $\gamma$  CAAGCTNCNTCTTAGCATCCTGGCTTTGTGTTATGTTGGGTT-----ATTCTCAAGCTACTATAGCAGAAGAC : 68  
Saha IFN $\gamma$  . . . . . A . C . . . . . TT . . . . . C . TC . A . . CTTCTGGCTGTCT . . . . . T . ACC . AG . . . . . : 80  
Maeu IFN $\gamma$  . . . . . A . C . . . . . T . . . . . CC . . . . . G . AG . . . . . : 65  
Modo IFN $\gamma$  . . . . . T . G . . . . . A . C . . . . . ATTCTGGCTATGT . . . . . G . . . . . A . AC . . . . . T : 80

Phci IFN $\gamma$  CTAGGAACCTTTATGGAATACTTTTCAGAAATGGAAGTACATCATCTGATATATCTGATAATGG---GACTCTTTTCTTGAAG : 145  
Saha IFN $\gamma$  A . GCA . . . . . CACA . C . . . . . C . C . A . . . . . CG . . . . . A . GG . A . . . . . TT . . . . . TA . G . . . . . : 154  
Maeu IFN $\gamma$  . . . . . AA . T . . . . . C . . . . . A . . . . . A . . . . . : 139  
Modo IFN $\gamma$  . . . . . G . C . . . . . AC . C . . . . . C . . . . . GT . . . . . G . G . . . . . GG . A . TCG . C . . . . . ACA . . . . . : 157

Phci IFN $\gamma$  CATGATGGATCGTTTGAAAGAGG---ATGGTGACAAGAAAAATCCTAATGAGCCAAATTGTCACAGTTTATTTCAAAAATCT : 222  
Saha IFN $\gamma$  . . . . . A . GAC . . . . . GAA . CT . . . . . T . . . . . TG . . . . . G . . . . . : 234  
Maeu IFN $\gamma$  . . . . . C . C . . . . . CA . . . . . G . A . . . . . : 215  
Modo IFN $\gamma$  . . . . . A . A . . . . . CA . . . . . G . T . . . . . T . A . . . . . : 234

Phci IFN $\gamma$  TTGAAATCTTCAAGAACAACACCGTCAACAAAAAAGTGTGGAGAATATCAAAGAGGATATGATCATGAAATTCCTTCACT : 302  
Saha IFN $\gamma$  . C . . . . . A . . . . . T . A . TG . . . . . G . . . . . A . . . . . C . . . . . G . . . . . A . . . . . TC . . . . . : 314  
Maeu IFN $\gamma$  . C . . . . . A . . . . . AC . . . . . G . . . . . CC . . . . . C . . . . . C . . . . . : 295  
Modo IFN $\gamma$  . . . . . G . . . . . G . . . . . T . A . . . . . C . . . . . CC . . . . . TA . . . . . A . . . . . A . . . . . CA . . . . . : 314

Phci IFN $\gamma$  AACAACTGCTGCCAGCAAAGTGAATGACTTTGAAATCTGTCAACACTCAGGTGAATGACCTCAGAGTCCAAAAGAAAAGC : 382  
Saha IFN $\gamma$  . . . . . TCT . . . . . G . . . . . GG . AC . . . . . T . C . . . . . A . . . . . G . . . . . : 394  
Maeu IFN $\gamma$  . . . . . T . . . . . G . G . . . . . : 346  
Modo IFN $\gamma$  . . . . . TT . A . TG . CA . A . TA . . . . . GA . C . . . . . TT . A . . . . . G . . . . . : 394

Phci IFN $\gamma$  TATATTTGAACTAGCCCTTATCATGAATGACCTCTCAAACAACCTCATCTAAGAAAGAGAAAAAGAAGACAGAACANAA : 462  
Saha IFN $\gamma$  . . . . . G . . . . . T . TA . G . TT . CCG . A . . . . . CCG . . . . . C . GG . . . . . G . . . . . : 474  
Modo IFN $\gamma$  . . . . . ATGAA . . . . . C . A . . . . . TC . . . . . C . . . . . : 474

Phci IFN $\gamma$  GCCA : 466  
Saha IFN $\gamma$  . . . . : 478  
Modo IFN $\gamma$  . . . . : 478

## IL-4

Phci IL-4 GTCTCACATTCCAAGTATACCAACTTTGTTCTGCCTGTTAACATGTACCAGTGATGTTGTCCAGGGACAGAGAAGGACC : 80  
Maeu IL-4 . . . . . C . . . . . A . . . . . T . . . . . : 149  
Modo IL-4 . . . . . T . . . . . A . A . A . . . . . C . . . . . C . TC . T . T . . . . . C . A . A . . . . . GG : 84

Phci IL-4 TGCCAACCCTCTCTCAGAGAGATCGTCCACATGGCAAACCTCTCTTACTATGAAAAAGTTTCCCTGCTTTGAGATGGAAGT : 160  
Maeu IL-4 . . . . . GA . . . . . G . T . A . . . . . A . . . . . CT . . . . . T . G . . . . . : 229  
Modo IL-4 . . . . . AGT . . . . . G . T . . . . . A . . . . . G . . . . . TAT . TG . . . . . T . . . . . C . . . . . CC . . . . . C . . . . . T . . . . . C . . . . . C : 164

Phci IL-4 GCCGGACATCTTTGAGGATACAGAGAAATCCAGTACTCCGAAGCTGTTTCCTGAGGAGTCAATCATGCTCTCAGCTGGTCA : 240  
Maeu IL-4 . . . . . A . . . . . A . . . . . T . . . . . CG . . . . . T . . . . . A . . . . . : 309  
Modo IL-4 . . . . . A . . . . . AC . . . . . A . . . . . T . A . . . . . A . T . . . . . : 241

Phci IL-4 TGACAA TGAA TGACTTTGAAACATTATGCAGAGCTGTCACTGTGCTCCAACAGGTCTCCAACAGCTGCCCATTCCTAAG : 320  
Maeu IL-4 . . . . . C . . . . . G . . . . . A . . . . . C . . . . . : 389  
Modo IL-4 . . . . . G . . . . . C . . . . . G . . . . . C . . . . . G . . . . . AT . . . . . A . . . . . A . . . . . GCC . . . . . : 321

Phci IL-4 CTAAGCAACA TGCTTAGGAAACCTAATGCACCTTAGTGAAATCAGACCAAAATGTCCTGTGAATGAAACCAAGATTACTAAATT : 400  
Maeu IL-4 A . . . . . A . . . . . T . . . . . T . . . . . : 469  
Modo IL-4 . . . . . A . T . . . . . A . AA . . . . . A . TTT . . . . . T . . . . . T . . . . . T . . . . . : 401

Phci IL-4 GCAAGATTTTCTGAGCA : 417  
Maeu IL-4 . . . . . : 486  
Modo IL-4 . . . . . : 418

# IL-6

Intron 3

Phci IL-6 AACACCTGTTTGGCTTTTAGCAAACCATTGAAGTGATGTCTCTGTTTGTCCAGATGGAAAACAAGGCAGCTGGATTTTT : 80  
Modo IL-6 . . . . . GT . . . . . G . . . . . A . . . . . GC . . . . . A . . . . . C . . . . .  
Saha IL-6 . . . . . TG . . . . . T . . . . . C . . . . . G . . . . . T . . . . . C . . . . . T . . . . . C . . . . .

Phci IL-6 CCAAGTCCATAGGGCCATTGGGAGGAGAAA TGAGATGATATTACAGGAGAAGCACTTTGATTTTGTAGAGGGGTAAAGG : 160  
Modo IL-6 . . . . . C . . . . . C . . . . . AT . . . . . TTTA . . . . . A . . . . . CCT . A . . . . . T . . . . . CT . . . . . A . . . . . G . . . . . CA . . . . . A . . . . . GG . . . . .  
Saha IL-6 . . . . . C . . . . . C . . . . . AT . . . . . TTTA . . . . . A . . . . . GT . . . . . A . . . . . A . . . . . T . . . . . A . . . . . G . . . . . A . . . . .

Phci IL-6 AAA - - - - GGGAAAAGGAGCCATACAAGCTCTGCTTTAAAAGGTCAATTTTAAATTTTTATATAACTTTTTTCTTA : 235  
Modo IL-6 . . . . . AAAAT . . . . . A . . . . . G . . . . . AG . . . . . A . . . . . C . . . . . A . . . . . G . . . . . AC . . . . . T . . . . . TA . . . . . C . . . . . C . . . . . G . . . . . - . . . . . C . . . . . A . . . . .  
Saha IL-6 . . . . . G - - - - . . . . . G . . . . . G . . . . . A . . . . . T . . . . . T . . . . . G . . . . . AC . . . . . T . . . . . - . . . . . A . . . . . TA . . . . . C . . . . . - - - - . . . . . C . . . . . C . . . . .

Phci IL-6 TGGTAACCATAATTTTTCTCTT - - - - TTTACGTAAGGAGACA T<u>GCTTGCCAAGGATTGTGA</u>GTGGTCTTCAGGAGTTT : 311  
Modo IL-6 . . . . . C . . . . . T . . . . . TTTA . . . . . A . . . . . AT . . . . . A . . . . . CA . . . . . C . . . . . A . . . . . C . . . . .  
Saha IL-6 . . . . . C . . . . . T . . . . . G . . . . . A . . . . . TTT - - - - . . . . . A . . . . . C . . . . . AT . . . . . ACC . . . . . CA . . . . . C . . . . . AAA . . . . . G . . . . . A . . . . .

Phci IL-6 GACACGTATCTTCGGTACATGGAAACAGAGATGAAGGATAA - - - - - TAAGTTACAATACCTAAGAA T<u>GGGTACAGTTCA</u> : 385  
Modo IL-6 . . . . . TA . . . . . T . . . . . AAC . . . . . T . . . . . G . . . . . - - - - - C . . . . . G . . . . . T . . . . . AC . . . . . AGC . . . . . A . . . . . C . . . . . TAC . . . . .  
Saha IL-6 . . . . . GG . . . . . T . . . . . C . . . . . A . . . . . T . . . . . AT . . . . . C . . . . . A . . . . . A . . . . . GAAAAGC . . . . . G . . . . . A . . . . . CG . . . . . GCA . . . . . A . . . . . TTC . . . . . GAC . . . . .

Intron 4

Phci IL-6 <u>GCTCATCCA</u>CAAACCTGAAGCTCTTGGTGAAGTTTCCCTTTGC : 426  
Modo IL-6 AT . . . . . AGC . . . . . A . . . . . CT . . . . . AC . . . . . G . . . . .  
Saha IL-6 A . . . . . AGC . . . . . G . . . . . GTCT . . . . . AAAA . . . . .

# IL-10

Phci IL-10 ACATGCTCCGAGAACTTCGAGCAGCCTTCAGCAACGTGAAGATCTACTTTCAAACCAGAGACAAGCTCGAAACC - - - AAA : 77  
Trvu IL-10 . . . . . G . . . . . CA . . . . . G . . . . . G . . . . . - - - - . . . . . : 250  
Saha IL-10 T . . . . . T . . . . . A . . . . . A . . . . . G . . . . . GAGG . A . . . . . GGT . . . . . G . . . . . A . . . . . G . . . . . AT . . . . . GATTT . . . . . TGTG . G . . . . . : 183  
Modo IL10 . . . . . T . . . . . G . . . . . T . . . . . A . . . . . AG . . . . . T . . . . . G . . . . . - - - - . . . . . G . . . . . : 180

Phci IL-10 TTGATAGACAAA TCTTTGCTGGAAGAA TTAAGAGTTACCTGGGCTGCCAGGCCTTGTCAAGAGATGATTCAGTTTTACCT : 157  
Trvu IL-10 . . . . . A . . . . . : 330  
Saha IL-10 . . . . . T . . . . . TG . . . . . GC . . . . . C . . . . . C . . . . . C . . . . . AC . . . . . : 263  
Modo IL10 C . . . . . A . . . . . G . . . . . C . . . . . C . . . . . CC . . . . . CA . . . . . : 260

Phci IL-10 GGAGGAAGTGATGCCTCAGGCAGAGAAGAA TGAAGTGGACATCAAAGAGAACGTGGGCTC<u>TTTAGGGCAGAAAGCTGAAGG</u> : 237  
Trvu IL-10 . . . . . G . . . . . G . . . . . C . . . . . C . . . . . TG . . . . . G . . . . . C . . . . . A . . . . . AT . . . . . : 410  
Saha IL-10 . . . . . A . . . . . T . . . . . A . . . . . G . . . . . AC . . . . . G . . . . . GA . . . . . C . . . . . G . . . . . T . . . . . C . . . . . AAA . . . . . C . . . . . T . . . . . : 340  
Modo IL10 . . . . . A . . . . . G . . . . . G . . . . . G . . . . . A . . . . . C . . . . . G . . . . . A . . . . . C . . . . . AT . . . . . AC . . . . . A . . . . . : 337

Phci IL-10 CACTGAGATTGAGGCTCAAACGCTGTCA C<u>AGATTCCCTGCCCTGTGAAGA</u>TAGGAGCAGAGTTGTCAAGCAAGTCAAGAGC : 317  
Trvu IL-10 . . . . . C . . . . . G . . . . . A . . . . . C . . . . . C . . . . . AC . . . . . G . . . . . G . . . . . A . . . . . : 490  
Saha IL-10 GG . . . . . AG . . . . . CA . . . . . AA . . . . . T . . . . . TC . . . . . AA . . . . . T . . . . . CT . . . . . C . . . . . A . . . . . A . . . . . : 420  
Modo IL10 TT . . . . . C . . . . . G . . . . . CGA . . . . . AG . . . . . G . . . . . T . . . . . T . . . . . GC . . . . . GA . . . . . : 417

Phci IL-10 ACCTATGAGAAGCTCCAGGAACAAGGAGTCTACA - - - - - : 351  
Trvu IL-10 . . . . . A . . . . . G . . . . . AAGCAA TGGGGGATTTT GACATATTCATCGGC : 556  
Saha IL-10 . . . . . C . . . . . A . . . . . A . . . . . T . . . . . GTA . . . . . T . . . . . TCT . . . . . AAGCAA TGGGGGAGTTT AATATATTCATCAAC : 486  
Modo IL10 . . . . . AAGCTA TGGGGGATTTT GACATATTCATCAAC : 483

# GAPDH

|            |                                                                                     |       |
|------------|-------------------------------------------------------------------------------------|-------|
| Phci GAPDH | AGTCCACTGGCGTGTTTACCACCATGGA AAAAGGCTGGGGCTCACTTGAAGGGTGGAGCCAAGAGGGTCA TCATCTCTGCC | : 80  |
| Saha GAPDH | .....G.....T.....C.A.....A                                                          | : 400 |
| Maeu GAPDH | .....                                                                               | : 51  |
| Modo GAPDH | .....C.C.....T.....                                                                 | : 201 |
| Phci GAPDH | CCTTCTGCTGATGCCCCAA TGTTTCGTGATGGGAGTGAACCATGAGAAA TATGATAAATTCCTTAAGATTGTCAGTAACGC | : 160 |
| Saha GAPDH | .....C.....T.....G.....C.....C.....T.....                                           | : 480 |
| Maeu GAPDH | .....                                                                               | : 131 |
| Modo GAPDH | .....C.....G.....C.....C.....C.....C.....T.....                                     | : 281 |
| Phci GAPDH | TTCCTGCACTACCAATTGCTTGGCCCCCTGGCCAAGGTCA TTCA TGACA ACTTTGGCATTGTGGAAGGACTCATGACTA  | : 240 |
| Saha GAPDH | C.....C.....T.....T.....N.....C.....A.....C.....                                    | : 560 |
| Maeu GAPDH | .....C.....T.....T.....                                                             | : 211 |
| Modo GAPDH | C.....C.....A.....C.....C.....C.....C.....                                          | : 361 |
| Phci GAPDH | CAGTCCATGCCATTACTGCTACCCAGAAGACAGTAGA TGGCCCCCTCTGGTAAGCTGTGGCGTGATGGGCGTGGTGTCTCC  | : 320 |
| Saha GAPDH | .....T.....C.....T.....C.....C.....C.....G.....                                     | : 640 |
| Maeu GAPDH | .....                                                                               | : 291 |
| Modo GAPDH | .....C.....C.....C.....G.....G.....                                                 | : 441 |
| Phci GAPDH | CAAAACATCATCCCTGCTTCCACTGGTGCTGCTAAAGCTGTAGGCAAGGTCA TACCTGAGCTGAA TGGGAAGCTCACAGG  | : 400 |
| Saha GAPDH | .....G.....C.....G.....C.....C.....A.....A.....                                     | : 720 |
| Maeu GAPDH | .....G.....                                                                         | : 371 |
| Modo GAPDH | .....T.....C.....C.....C.....G.....G.....C.....C.....                               | : 521 |
| Phci GAPDH | CATGGCCTTCCGTGTTTCTACTCCCAA TGTATCTGTTGTGGA TCTGACCTGCCGTCTGGAAAAACCTGCCAAAATATGATG | : 480 |
| Saha GAPDH | .....T.....C.....C.....G.....C.....G.....C.....                                     | : 800 |
| Maeu GAPDH | .....C.....G.....                                                                   | : 451 |
| Modo GAPDH | .....C.....C.....G.....C.....G.....T.....C.....G.....G.....C.....                   | : 601 |
| Phci GAPDH | ATATCAAGAAAGTGGTGAAGGAAGCATCAGAAGGACCC TTGAAGGGCATCTTGGGCTACACAGAGGACC - - - - -    | : 549 |
| Saha GAPDH | .....C.....C.....G.....T.....A.....AGGTTGTATCC                                      | : 880 |
| Maeu GAPDH | .....C.G.....G.....AGGTTGTGTCC                                                      | : 531 |
| Modo GAPDH | .....C.....G.....C.....G.....G.....G.....A.....A.....AGGTTGTATCC                    | : 681 |
